# Supplementary material for: Reducing the Impact of Headache and Allodynia Score in Chronic Migraine: An Exploratory Analysis from the Real-World Effectiveness of Anti-CGRP Monoclonal Antibodies Compared to Onabotulinum Toxin A (RAMO) Study
Source: MDPI journal article supplement (doi:10.3390/toxins16040178), 2024-04-07
Supplement: s1 [file s1]

# Reducing the Impact of Headache and Allodynia Score in Chronic Migraine: An Exploratory Analysis from the Real-World Effectiveness of Anti-CGRP Monoclonal Antibodies Compared to Onabotulinum Toxin A (RAMO) Study

Danilo Antonio Montisano <sup>1,†</sup>, Riccardo Giossi <sup>2,3,†</sup>, Mattia Canella <sup>4,5</sup>, Claudia Altamura <sup>6,7</sup>, Marilena Marcosano <sup>6,7</sup>, Fabrizio Vernieri <sup>6,7</sup>, Alberto Raggi <sup>8</sup> and Licia Grazzi <sup>1,9,\*</sup>

## Supplementary material S1. STROBE Checklist

Checklist of items that should be included in reports of *cohort studies*

|                          | Item No | Recommendation                                                                                                                                                                       | Page       |
|--------------------------|---------|--------------------------------------------------------------------------------------------------------------------------------------------------------------------------------------|------------|
| Title and abstract       | 1       | (a) Indicate the study’s design with a commonly used term in the title or the abstract                                                                                               | Title Page |
|                          |         | (b) Provide in the abstract an informative and balanced summary of what was done and what was found                                                                                  | 1          |
| Introduction             |         |                                                                                                                                                                                      |            |
| Background/rationale     | 2       | Explain the scientific background and rationale for the investigation being reported                                                                                                 | 2          |
| Objectives               | 3       | State specific objectives, including any prespecified hypotheses                                                                                                                     | 3          |
| Methods                  |         |                                                                                                                                                                                      |            |
| Study design             | 4       | Present key elements of study design early in the paper                                                                                                                              | 9          |
| Setting                  | 5       | Describe the setting, locations, and relevant dates, including periods of recruitment, exposure, follow-up, and data collection                                                      | 9          |
| Participants             | 6       | (a) Give the eligibility criteria, and the sources and methods of selection of participants. Describe methods of follow-up                                                           | 9          |
|                          |         | (b) For matched studies, give matching criteria and number of exposed and unexposed                                                                                                  | NA         |
| Variables                | 7       | Clearly define all outcomes, exposures, predictors, potential confounders, and effect modifiers. Give diagnostic criteria, if applicable                                             | 9-10       |
| Data sources/measurement | 8*      | For each variable of interest, give sources of data and details of methods of assessment (measurement). Describe comparability of assessment methods if there is more than one group | 9-10       |
| Bias                     | 9       | Describe any efforts to address potential sources of bias                                                                                                                            | 8          |
| Study size               | 10      | Explain how the study size was arrived at                                                                                                                                            | 9-10       |
| Quantitative variables   | 11      | Explain how quantitative variables were handled in the analyses. If applicable, describe which groupings were chosen and why                                                         | 9-10       |

|                     |     |                                                                                                                                                                                                              |                                 |
|---------------------|-----|--------------------------------------------------------------------------------------------------------------------------------------------------------------------------------------------------------------|---------------------------------|
| Statistical methods | 12  | (a) Describe all statistical methods, including those used to control for confounding                                                                                                                        | 9-10                            |
|                     |     | (b) Describe any methods used to examine subgroups and interactions                                                                                                                                          | 9-10                            |
|                     |     | (c) Explain how missing data were addressed                                                                                                                                                                  | 9-10                            |
|                     |     | (d) If applicable, explain how loss to follow-up was addressed                                                                                                                                               | NA                              |
|                     |     | (e) Describe any sensitivity analyses                                                                                                                                                                        | 9-10                            |
| <b>Results</b>      |     |                                                                                                                                                                                                              |                                 |
| Participants        | 13* | (a) Report numbers of individuals at each stage of study—eg numbers potentially eligible, examined for eligibility, confirmed eligible, included in the study, completing follow-up, and analysed            | 3-4, Table 1, Table 2, Table 3  |
|                     |     | (b) Give reasons for non-participation at each stage                                                                                                                                                         | NA                              |
|                     |     | (c) Consider use of a flow diagram                                                                                                                                                                           | NA                              |
| Descriptive data    | 14* | (a) Give characteristics of study participants (eg demographic, clinical, social) and information on exposures and potential confounders                                                                     | 4, Table 1                      |
|                     |     | (b) Indicate number of participants with missing data for each variable of interest                                                                                                                          | All Tables                      |
|                     |     | (c) Summarise follow-up time (eg, average and total amount)                                                                                                                                                  | 4, Figure 1, Table 2            |
| Outcome data        | 15* | Report numbers of outcome events or summary measures over time                                                                                                                                               | 5-6, Table 2, Table 3           |
| Main results        | 16  | (a) Give unadjusted estimates and, if applicable, confounder-adjusted estimates and their precision (eg, 95% confidence interval). Make clear which confounders were adjusted for and why they were included | 6, Table 2                      |
|                     |     | (b) Report category boundaries when continuous variables were categorized                                                                                                                                    | 6, Table 2                      |
|                     |     | (c) If relevant, consider translating estimates of relative risk into absolute risk for a meaningful time period                                                                                             | NA                              |
| Other analyses      | 17  | Report other analyses done—eg analyses of subgroups and interactions, and sensitivity analyses                                                                                                               | 6-7, Table 2, Table 3, Table S1 |
| <b>Discussion</b>   |     |                                                                                                                                                                                                              |                                 |
| Key results         | 18  | Summarise key results with reference to study objectives                                                                                                                                                     | 7                               |
| Limitations         | 19  | Discuss limitations of the study, taking into account sources of potential bias or imprecision. Discuss both direction and magnitude of any potential bias                                                   | 8                               |
| Interpretation      | 20  | Give a cautious overall interpretation of results considering objectives, limitations, multiplicity of analyses, results from similar studies, and other relevant evidence                                   | 7-8                             |
| Generalisability    | 21  | Discuss the generalisability (external validity) of the study results                                                                                                                                        | 7-8                             |

---

|                          |    |                                                                                                                                                               |    |
|--------------------------|----|---------------------------------------------------------------------------------------------------------------------------------------------------------------|----|
| <b>Other information</b> |    |                                                                                                                                                               |    |
| Funding                  | 22 | Give the source of funding and the role of the funders for the present study and, if applicable, for the original study on which the present article is based | 10 |

---

| <b>Table S1. ASC-12 sensitivity analysis</b>                                                                                                                                                                                                                                                                                                   |                       |                  |                |                            |                |
|------------------------------------------------------------------------------------------------------------------------------------------------------------------------------------------------------------------------------------------------------------------------------------------------------------------------------------------------|-----------------------|------------------|----------------|----------------------------|----------------|
|                                                                                                                                                                                                                                                                                                                                                | <b>Anti-CGRP mAbs</b> | <b>BoNT-A</b>    | <b>p-value</b> | <b>Adjusted MD (95%CI)</b> | <b>p-value</b> |
| <b>ASC-12 ≥ 3 points (mild allodynia)</b>                                                                                                                                                                                                                                                                                                      |                       |                  |                |                            |                |
| Baseline ASC-12                                                                                                                                                                                                                                                                                                                                |                       |                  | <b>0.0012</b>  | NA                         | NA             |
| Mean (SD)                                                                                                                                                                                                                                                                                                                                      | 12.5 (3.8)            | 7.5 (3.7)        |                |                            |                |
| Median (IQR)                                                                                                                                                                                                                                                                                                                                   | 14 (8 to 15)          | 7 (4.5 to 10)    |                |                            |                |
|                                                                                                                                                                                                                                                                                                                                                | n=10                  | n=36             |                |                            |                |
| 6 months CFB                                                                                                                                                                                                                                                                                                                                   |                       |                  | <b>0.0202</b>  | -6.1 (-11.8 to -0.4)       | <b>0.036</b>   |
| Mean (SD)                                                                                                                                                                                                                                                                                                                                      | -5.8 (5.9)            | -1.2 (4.4)       |                |                            |                |
| Median (IQR)                                                                                                                                                                                                                                                                                                                                   | -4 (-8 to -3)         | -1 (-4.5 to 0.5) |                |                            |                |
|                                                                                                                                                                                                                                                                                                                                                | n=9                   | n=36             |                |                            |                |
| 12 months CFB                                                                                                                                                                                                                                                                                                                                  |                       |                  | <b>0.0083</b>  | -5.5 (-11.0 to 0.1)        | 0.052          |
| Mean (SD)                                                                                                                                                                                                                                                                                                                                      | -6.7 (5.2)            | -1.8 (4.0)       |                |                            |                |
| Median (IQR)                                                                                                                                                                                                                                                                                                                                   | -6 (-8 to -4)         | -2 (-3 to 2)     |                |                            |                |
|                                                                                                                                                                                                                                                                                                                                                | n=9                   | n=29             |                |                            |                |
| <b>ASC-12 ≥ 6 points (moderate allodynia)</b>                                                                                                                                                                                                                                                                                                  |                       |                  |                |                            |                |
| Baseline ASC-12                                                                                                                                                                                                                                                                                                                                |                       |                  | <b>0.0143</b>  | NA                         | NA             |
| Mean (SD)                                                                                                                                                                                                                                                                                                                                      | 12.5 (3.8)            | 9.16 (3.2)       |                |                            |                |
| Median (IQR)                                                                                                                                                                                                                                                                                                                                   | 14 (8 to 15)          | 8 (7 to 11)      |                |                            |                |
|                                                                                                                                                                                                                                                                                                                                                | n=10                  | n=25             |                |                            |                |
| 6 months CFB                                                                                                                                                                                                                                                                                                                                   |                       |                  | 0.0919         | -5.8 (-12.7 to 1.1)        | 0.096          |
| Mean (SD)                                                                                                                                                                                                                                                                                                                                      | -5.8 (5.8)            | -2.0 (4.5)       |                |                            |                |
| Median (IQR)                                                                                                                                                                                                                                                                                                                                   | -4 (-8 to -3)         | -2 (-5 to 1)     |                |                            |                |
|                                                                                                                                                                                                                                                                                                                                                | n=9                   | n=25             |                |                            |                |
| 12 months CFB                                                                                                                                                                                                                                                                                                                                  |                       |                  | <b>0.0455</b>  | -6.7 (-13.0 to -0.5)       | <b>0.037</b>   |
| Mean (SD)                                                                                                                                                                                                                                                                                                                                      | -6.7 (5.2)            | -2.6 (4.4)       |                |                            |                |
| Median (IQR)                                                                                                                                                                                                                                                                                                                                   | -6 (-8 to -4)         | -2 (-6 to 0)     |                |                            |                |
|                                                                                                                                                                                                                                                                                                                                                | n=9                   | n=21             |                |                            |                |
| <b>ASC-12 &gt; 9 points (severe allodynia)</b>                                                                                                                                                                                                                                                                                                 |                       |                  |                |                            |                |
| Baseline ASC-12                                                                                                                                                                                                                                                                                                                                |                       |                  | 0.1639         | NA                         | NA             |
| Mean (SD)                                                                                                                                                                                                                                                                                                                                      | 14.4 (2.6)            | 12.5 (2.1)       |                |                            |                |
| Median (IQR)                                                                                                                                                                                                                                                                                                                                   | 14 (14 to 15)         | 12 (11 to 14)    |                |                            |                |
|                                                                                                                                                                                                                                                                                                                                                | n=7                   | n=10             |                |                            |                |
| 6 months CFB                                                                                                                                                                                                                                                                                                                                   |                       |                  | <b>0.0100</b>  | Not estimable              | NA             |
| Mean (SD)                                                                                                                                                                                                                                                                                                                                      | -6.3 (6.3)            | -0.8 (4.0)       |                |                            |                |
| Median (IQR)                                                                                                                                                                                                                                                                                                                                   | -4 (-6 to -3)         | -1 (-2 to 1)     |                |                            |                |
|                                                                                                                                                                                                                                                                                                                                                | n=6                   | n=10             |                |                            |                |
| 12 months CFB                                                                                                                                                                                                                                                                                                                                  |                       |                  | 0.6822         | Not estimable              | NA             |
| Mean (SD)                                                                                                                                                                                                                                                                                                                                      | -6.3 (6.0)            | -4.5 (4.8)       |                |                            |                |
| Median (IQR)                                                                                                                                                                                                                                                                                                                                   | -5 (-7 to -2)         | -3.5 (-8 to -2)  |                |                            |                |
|                                                                                                                                                                                                                                                                                                                                                | n=7                   | n=8              |                |                            |                |
| Abbreviations: 95%CI=95% confidence interval; ANOVA=analysis of variance; ASC-12=allodynia symptoms checklist; BoNT-A=Onabotulinumtoxin-A; CGRP=calcitonin gene related protein; HIT-6=headache impact test; IQR=interquartile range; mAbs=monoclonal antibodies; MD=mean difference; NA=not applicable; OR=odds ratio; SD=standard deviation. |                       |                  |                |                            |                |
| Unadjusted comparisons performed by means of the Wilcoxon rank-sum test. Adjusted analysis was performed with an ANOVA model with significantly different baseline variables entered as covariates to estimate MD with 95%CI for continuous variables.                                                                                         |                       |                  |                |                            |                |
